# Supplementary material for: Evaluation of Dietary Intake in Individuals with Mild Cognitive Impairment
Source: MDPI journal article supplement (doi:10.3390/nu15173694), 2023-08-23
Supplement: s1 [file s1]

**Supplementary Table S1.** MIND diet component, servings, and scores <sup>a</sup>

| Item/Score                          | 0                   | 0.5           | 1                |
|-------------------------------------|---------------------|---------------|------------------|
| Green leafy vegetables <sup>b</sup> | ≤2 servings/wk      | > 2 to <6/wk  | ≥6 servings/wk   |
| Other vegetables <sup>c</sup>       | <5 serving/wk       | 5 to <7 wk    | ≥1 serving/day   |
| Berries <sup>d</sup>                | <1 serving/wk       | 1 /wk         | ≥2 servings/wk   |
| Nuts                                | <1 serving /mo      | 1/mo to <5/wk | ≥5 servings/wk   |
| Olive oil                           | Not primary oil     |               | Primary oil used |
| Butter, margarine                   | >2 times/d          | 1–2 times/d   | <1 times/d       |
| Cheese                              | 7+ servings/wk      | 1–6 /wk       | < 1 serving/wk   |
| Whole grains                        | <1 serving/d        | 1–2 /d        | ≥3 servings/d    |
| Fish (not fried) <sup>e</sup>       | Rarely              | 1–3 /mo       | ≥1 meals/wk      |
| Beans <sup>f</sup>                  | <1 meal/wk          | 1–3/wk        | >3 meals/wk      |
| Poultry (not fried) <sup>g</sup>    | <1 meal/wk          | 1 /wk         | ≥2 meals/wk      |
| Red meat and products <sup>h</sup>  | 7+ meals/wk         | 4–6 /wk       | < 4 meals/wk     |
| Fast fried foods <sup>i</sup>       | 4+ times/wk         | 1–3 /wk       | <1 time/wk       |
| Pastries & sweets <sup>j</sup>      | 7+ servings/wk      | 5 –6 /wk      | <5 servings/wk   |
| Wine                                | >1 glass/d or never | 1/mo to 6/wk  | 1 glass/d        |
| Total score                         | 15                  |               |                  |

<sup>a</sup> Vegetables 1 serving = 0.5 cup, 118.3 g (USA) = 0.5 bowl, 100 g (Taiwan); Berries 1 serving = 0.5 cup, 118.3 g (USA) strawberries 170 g (Taiwan); Nuts 1 serving = 1 oz, 28.35 g (USA) = 1 time, 15 g (Taiwan); Grains 1 serving = dry weight 15~20 g (USA) = dry weight 20 g (Taiwan).

<sup>b</sup> Kale, collards, greens; spinach; lettuce/tossed salad.

<sup>c</sup> Green/red peppers, squash, cooked carrots, raw carrots, broccoli, celery, potatoes, peas or lima beans, potatoes, tomatoes, tomato sauce, string beans, beets, corn, zucchini/summer squash/eggplant, coleslaw, potato salad.

<sup>d</sup> Strawberries.

<sup>e</sup> Tuna sandwich, fresh fish as a main dish; not fried fish cakes, sticks, or sandwiches.

<sup>f</sup> Beans, lentils, soybeans.

<sup>g</sup> Chicken or turkey sandwich, chicken or turkey as a main dish and never eat fried at home or away from home.

<sup>h</sup> Cheeseburger, hamburger, beef tacos/burritos, hot dogs/sausages, roast beef or ham sandwich, salami, bologna, or other deli meat sandwich, beef (steak, roast) or lamb as a main dish, pork or ham as a main dish, meat balls or meatloaf.

<sup>i</sup> How often do you eat fried food away from home (like French fries, chicken nuggets)?

<sup>j</sup> Biscuits/rolls, pop tarts, cake, snack cakes/Twinkies, Danish/sweet rolls/pastry, donuts, cookies, brownies, pie, candy bars, other candy, ice cream, pudding, milkshakes/frappes.

MIND, Mediterranean-DASH intervention for neurodegenerative delay.
